# Supplementary material for: An augmented Mendelian randomization approach provides causality of brain imaging features on complex traits in a single biobank-scale dataset
Source: PLOS journal article supplement (doi:10.1371/journal.pgen.1011112), 2023-12-27
Supplement: S7 (10.1371/journal.pgen.1011112.s007) [file journal.pgen.1011112.s007]

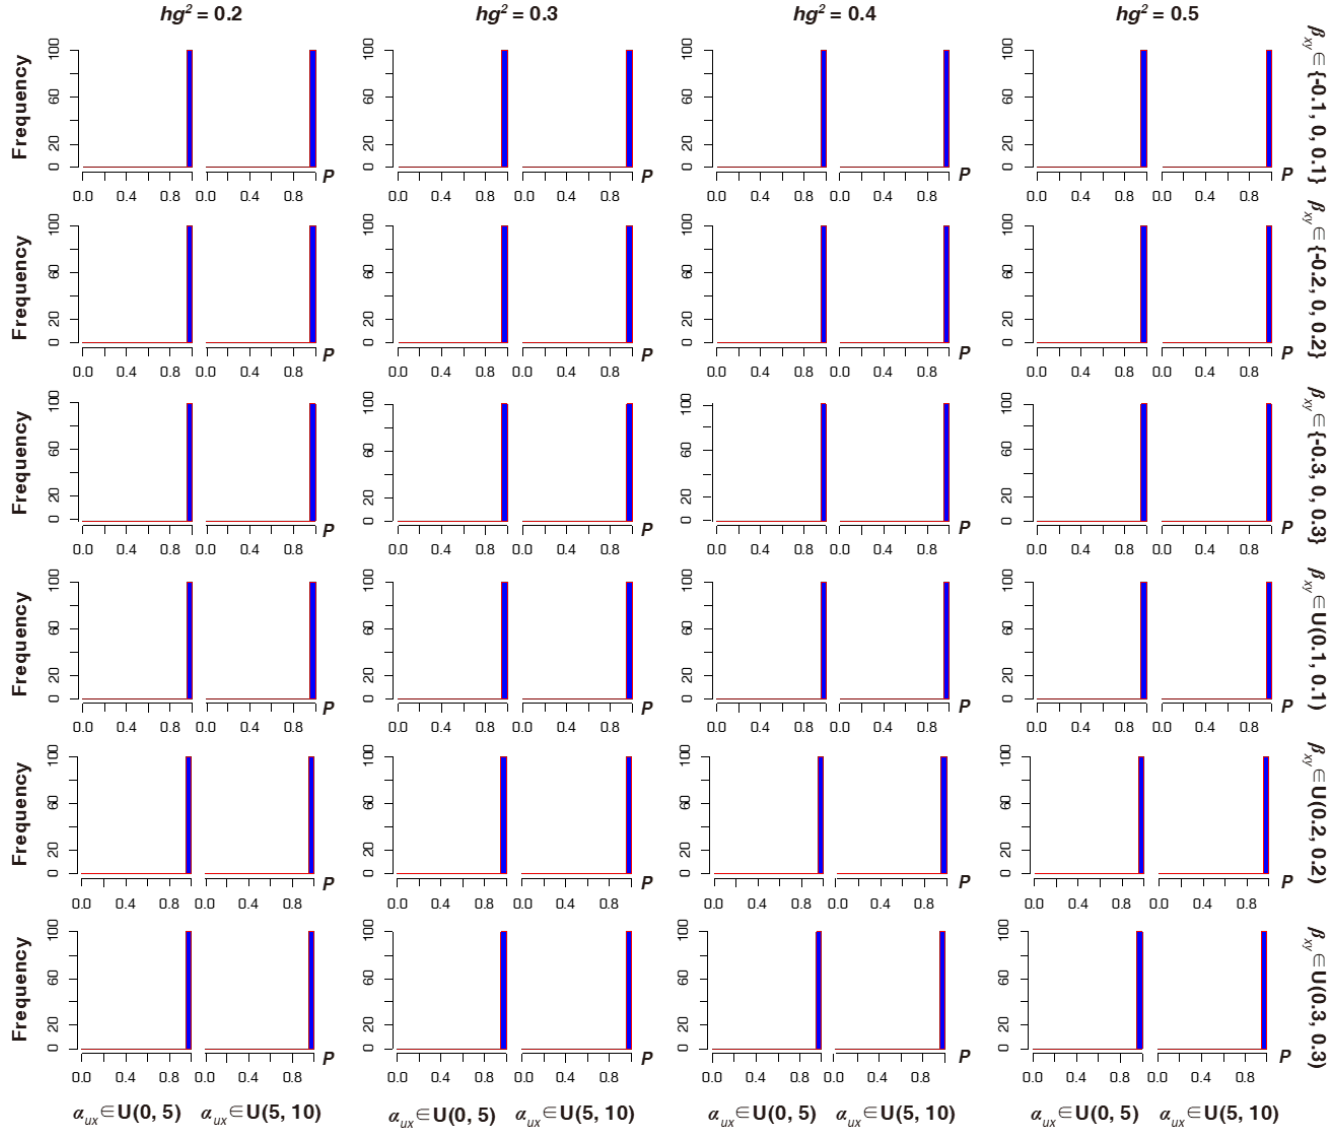

**S7 Fig. Sargan test  $P$ -value distribution of MR-PL with WC-correction in baseline simulation where no pleiotropy exists.** A histogram illustrating the distribution of  $P$ -values across 100 replications is presented for each parameter setting. A  $P$ -value exceeding 0.05 indicates the absence of pleiotropy.
